# Supplementary material for: Tailoring the crystallinity of solution-processed 6,13-bis(triisopropylsilylethynyl)pentacene via controlled solidification
Source: Royal Society of Chemistry journal article supplement (doi:10.1039/c9sm01159e), 2019-01-01
Supplement: c9sm01159e1.pdf [file c9sm01159e1.pdf]

**Supporting Information for**

**Tailoring the Crystallinity of Solution-Processed  
6,13-Bis(triisopropylsilylethynyl)pentacene via  
Controlled Solidification**

Hye Su Kim,<sup>‡a</sup> Jun Hwa Park,<sup>‡a</sup> Wi Hyoung Lee,<sup>b</sup> Hyun Ho Kim,<sup>\*c</sup> Yeong Don Park,<sup>\*a</sup>

Department of Energy and Chemical Engineering, Innovation Center for Chemical Engineering, Incheon National University, Incheon 22012, Republic of Korea

Department of Organic and Nano System Engineering, Konkuk University, Seoul 05029, Republic of Korea

Institute for Quantum Computing, University of Waterloo, Waterloo, N2L 3G1 (Canada)

<sup>‡</sup>These authors contributed equally.

E-mail: ydpark@inu.ac.kr

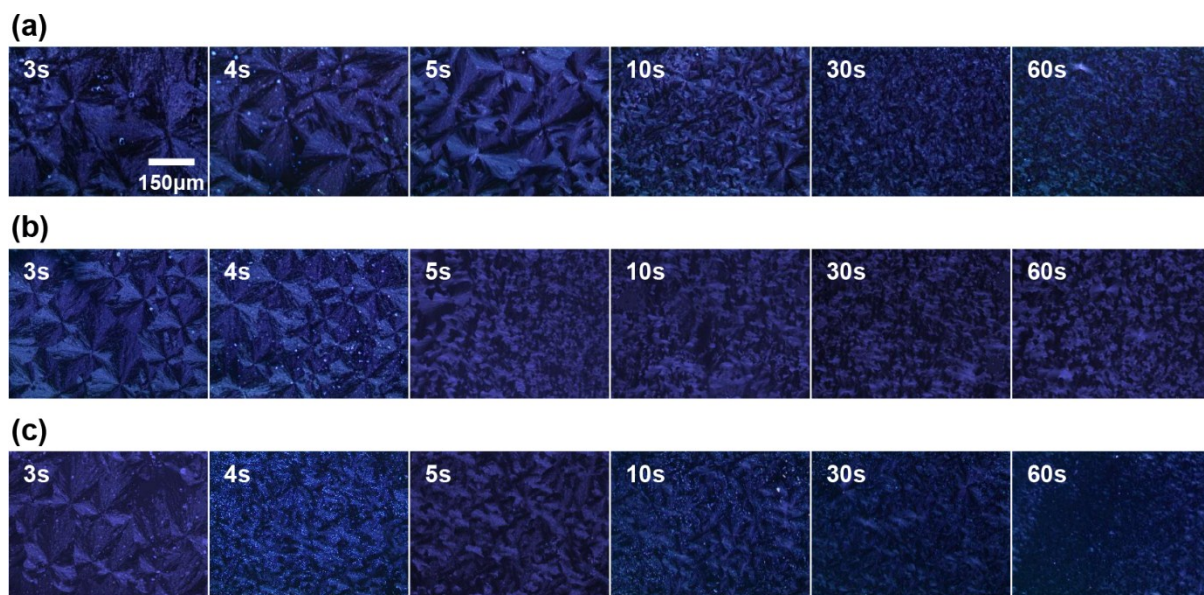

**Figure S1.** Spinning-time-dependent polarized optical microscope images of fully dried TIPS-pentacene films deposited at initial spinning rates of (a) 1200 rpm, (b) 1500 rpm, and (c) 2000 rpm.

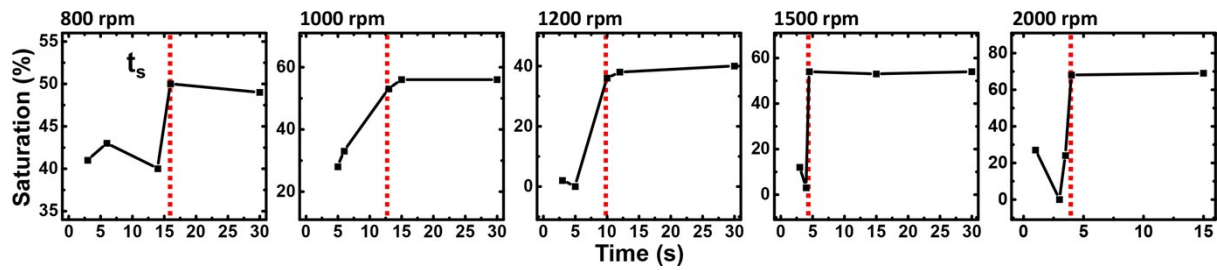

Figure S2. Time-dependent saturation values of the recorded video microscopy images as a function of spinning rate.

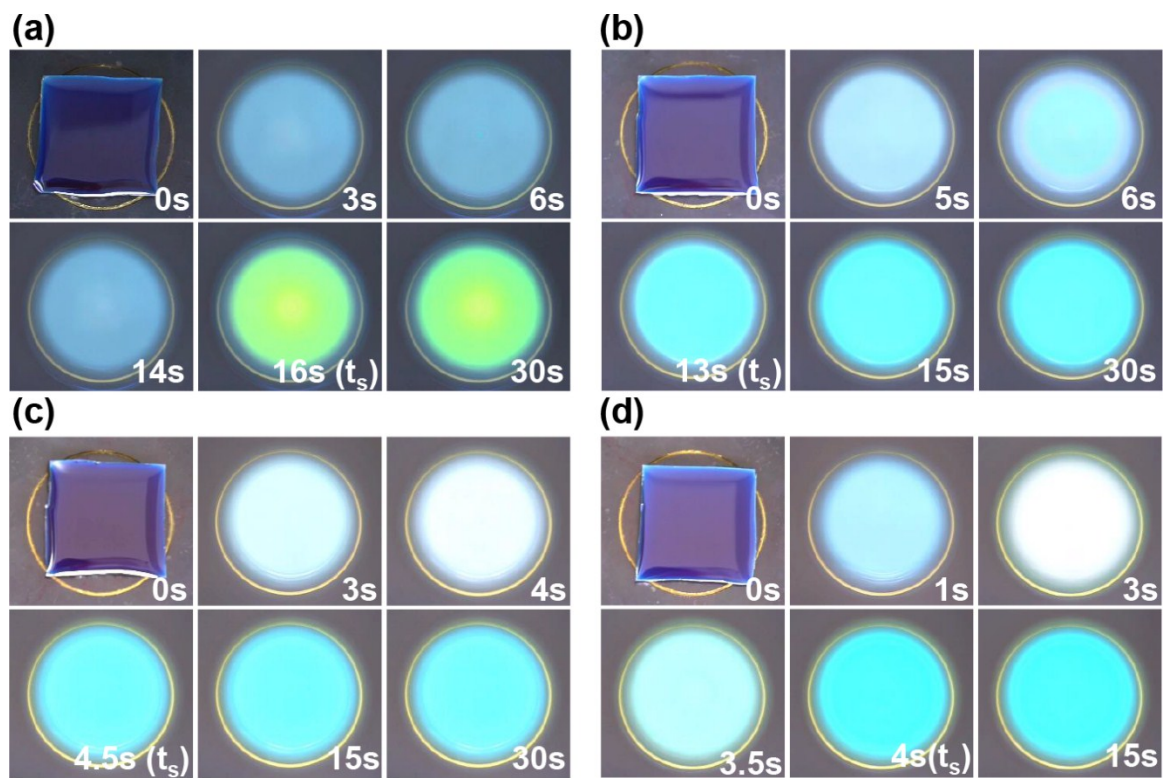

Figure S3. Video microscopy images of the time-dependent spin-coating process with (a) 800 rpm, (b) 1000 rpm, (c) 1500 rpm and (d) 2000 rpm, respectively.

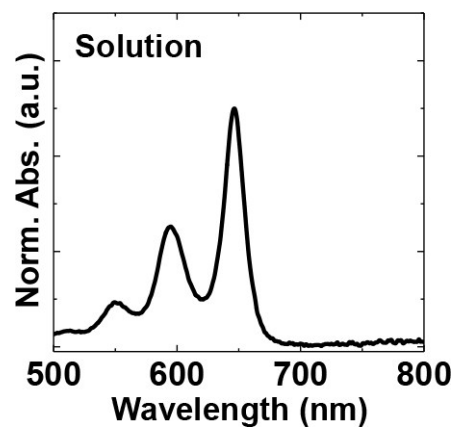

**Figure S4.** UV-vis spectrum of TIPS-pentacene dissolved in CB.

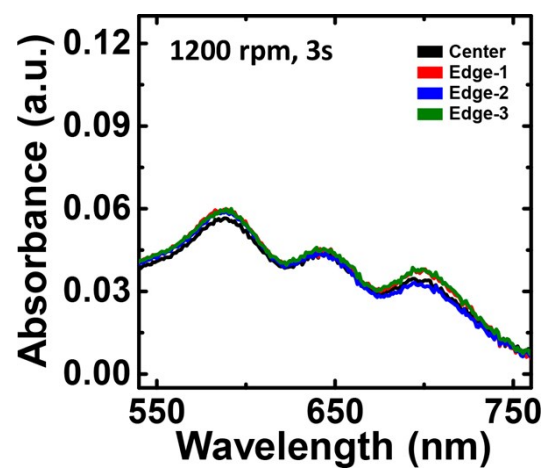

Figure S5. Position-dependent UV-vis spectra within the identical sample (spinning rate = 1200 rpm, time = 3s.)
